# Supplementary material
Source: PubMed Central journal article supplement (PMC1924488)
Supplement: blood_blood-2006-08-040097_2.pdf [file blood_blood-2006-08-040097_2.pdf]

**Online Supplemental Table S1.** The expression level of proteins identified by protein arrays.

| Protein name and function                                              | Gene name      | ProteinBank <sup>TM</sup><br>Accession number | Ratio                  | P value |
|------------------------------------------------------------------------|----------------|-----------------------------------------------|------------------------|---------|
|                                                                        |                |                                               | $\frac{EC/SMC}{EC/EC}$ |         |
| Interleukin 1 beta                                                     | IL-1 $\beta$   | AAM88883                                      | 4.16 $\pm$ 0.12*       | 0.0002  |
| Interleukin 6                                                          | IL-6           | AAH15511                                      | 4.13 $\pm$ 0.19*       | 0.001   |
| Basic fibroblast growth factor                                         | bFGF           | AAB21432                                      | 1.85 $\pm$ 0.07        | 0.0001  |
| Platelet-derived growth factor BB                                      | PDGF-BB        | CAA67262                                      | 1.44 $\pm$ 0.04        | 0.005   |
| Monocyte chemotactic protein 1                                         | MCP-1          | AAB29926                                      | 1.37 $\pm$ 0.06        | 0.0082  |
| Growth-related oncogene                                                | GRO            | AAA36985                                      | 1.35 $\pm$ 0.06        | 0.0014  |
| Regulated-on-activation normal T cell expressed and secreted chemokine | RANTES         | AAC03541                                      | 1.32 $\pm$ 0.20        | 0.038   |
| Stromal derived factor 1                                               | SDF-1          | P48061                                        | 1.25 $\pm$ 0.01        | 0.0000  |
| Thymus and activation-regulated chemokine                              | TARC           | Q92583                                        | 1.21 $\pm$ 0.02        | 0.00042 |
| Cuteaneous T-cell attracting chemokine                                 | CTACK          | Q9Y4X3                                        | 1.20 $\pm$ 0.02        | 0.121   |
| Neutrophil-activating peptide 78                                       | ENA-78         | CAA55355                                      | 1.20 $\pm$ 0.04        | 0.006   |
| Nerve growth factor B                                                  | b-NGF          | AAD55975                                      | 1.19 $\pm$ 0.01        | 0.009   |
| 30 kDa adipocyte complement-related protein                            | Acrp30         | Q15848                                        | 1.18 $\pm$ 0.03        | 0.00005 |
| Transforming growth factor beta 1                                      | TGF- $\beta$ 1 | AAL27646                                      | 1.17 $\pm$ 0.02        | 0.0001  |
| Intercellular adhesion molecule 3                                      | ICAM-3         | AAB27451                                      | 1.16 $\pm$ 0.04        | 0.038   |
| Epidermal growth factor receptor                                       | EGF-R          | AAB19486                                      | 1.15 $\pm$ 0.05        | 0.08    |
| Transforming growth factor beta 3                                      | TGF- $\beta$ 3 | AAQ98616                                      | 1.15 $\pm$ 0.02        | 0.014   |
| Stem cell factor                                                       | SCF            | AAD22048                                      | 1.15 $\pm$ 0.01        | 0.001   |
| Tissue inhibitor of metalloproteases 3                                 | TIMP-3         | NP_000353                                     | 1.14 $\pm$ 0.03        | 0.001   |
| Tyrosine-protein kinase DTK                                            | Dtk            | Q06418                                        | 1.13 $\pm$ 0.01        | 0.097   |

| Protein name and function                         | Gene name    | ProteinBank <sup>TM</sup><br>Accession number | Ratio                  | P value |
|---------------------------------------------------|--------------|-----------------------------------------------|------------------------|---------|
|                                                   |              |                                               | $\frac{EC/SMC}{EC/EC}$ |         |
| Insulin-like growth factor binding protein 6      | IGFBP-6      | CAA46088                                      | 1.08 ± 0.04            | 0.152   |
| Angiogenin                                        | Ang          | AAL67714                                      | 1.08 ± 0.02            | 0.07    |
| Fit-3 ligand                                      | Fit-3 ligand | P19099                                        | 1.07 ± 0.02            | 0.003   |
| Tumor necrosis factor beta                        | TNF-β        | AAD18092                                      | 1.07 ± 0.04            | 0.046   |
| Eotaxin 2                                         | Eotaxin-2    | O00175                                        | 1.07 ± 0.03            | 0.341   |
| Fibroblast growth factor 4                        | FGF-4        | CAA74200                                      | 1.05 ± 0.05            | 0.268   |
| CX3C chemokine receptor 1 (Fractalkine receptor)  | Fractalkine  | P49238                                        | 1.05 ± 0.12            | 0.01    |
| Amphiregulin                                      | Amphiregulin | AAA51781                                      | 1.05 ± 0.01            | 0.346   |
| Interleukin 1 alpha                               | IL-1α        | CAA27448                                      | 1.04 ± 0.04            | 0.284   |
| Leptin                                            | Leptin       | AAY46797                                      | 1.03 ± 0.05            | 0.383   |
| Auxin-independent growth promoter                 | Axi          | BAB09990                                      | 1.03 ± 0.04            | 0.531   |
| BDNF                                              | BDNF         | CAA62632                                      | 1.03 ± 0.01            | 0.144   |
| Interferon-inducible T cell alpha chemoattractant | I-TAC        | AAK52900                                      | 1.03 ± 0.02            | 0.328   |
| Thymus expressed chemokine                        | TECK         | O15444                                        | 1.03 ± 0.01            | 0.452   |
| Monocyte chemotactic protein 3                    | MCP-3        | P80098                                        | 1.02 ± 0.02            | 0.725   |
| Interleukin 8                                     | IL-8         | CAA77745                                      | 1.02 ± 0.04            | 0.616   |
| Betacellulin                                      | BTC          | AAB25452                                      | 1.01 ± 0.05            | 0.800   |
| Agouti related protein                            | AgRP         | AAK96256                                      | 1.01 ± 0.01            | 0.783   |
| Macrophage inflammatory protein 1 alpha           | MIP-1α       | AAB25757                                      | 1.00 ± 0.02            | 0.812   |
| Fibroblast growth factor 6                        | FGF-6        | AAS79318                                      | 1.00 ± 0.02            | 0.907   |

| Protein name and function                         | Gene name      | ProteinBank <sup>TM</sup><br>Accession number | Ratio           | P value |
|---------------------------------------------------|----------------|-----------------------------------------------|-----------------|---------|
|                                                   |                |                                               | EC/SMC<br>EC/EC |         |
| Interleukin 6 receptor                            | IL-6R          | CAA41231                                      | 1.00 ± 0.01     | 0.957   |
| Fibroblast growth factor 7                        | FGF-7          | CAG46799                                      | 1.00 ± 0.02     | 0.893   |
| Interleukin 18                                    | IL-18          | AAH07461                                      | 0.99 ± 0.06     | 0.935   |
| Tumor necrosis factor alpha                       | TNF- $\alpha$  | CAA26669                                      | 0.99 ± 0.01     | 0.676   |
| CC chemokine ligand 28                            | CCL-28         | Q9NRJ3                                        | 0.98 ± 0.03     | 0.667   |
| Tumor necrosis factor receptor 1 precursor        | sTNF RI        | NP_001056                                     | 0.98 ± 0.01     | 0.898   |
| Eotaxin 3                                         | Eotaxin-3      | BAA36704                                      | 0.98 ± 0.03     | 0.816   |
| Tumor necrosis factor ligand superfamily member 6 | Fas/TNFRSF6    | P48023                                        | 0.98 ± 0.04     | 0.615   |
| Insulin-like growth factor binding protein 3      | IGFBP-3        | CAA07346                                      | 0.98 ± 0.03     | 0.507   |
| Macrophage stimulatory protein alpha              | MSP- $\alpha$  | P26927                                        | 0.97 ± 0.02     | 0.332   |
| Monocyte chemotactic protein 2                    | MCP-2          | P80075                                        | 0.96 ± 0.06     | 0.564   |
| Thrombopoietin                                    | Thrombopoietin | BAA06807                                      | 0.96 ± 0.03     | 0.537   |
| Tissue inhibitor of metalloproteases 1            | TIMP-1         | AAB19718                                      | 0.96 ± 0.01     | 0.261   |
| Interleukin 15                                    | IL-15          | AAU21241                                      | 0.96 ± 0.01     | 0.441   |
| Soluble glycoprotein 130                          | sgp130         | P40189                                        | 0.96 ± 0.02     | 0.157   |
| Interleukin 2 receptor alpha-subunit              | IL-2R $\alpha$ | AAB20279                                      | 0.95 ± 0.03     | 0.117   |
| Monocyte chemotactic protein 4                    | MCP-4          | Q99616                                        | 0.95 ± 0.03     | 0.338   |
| Intercellular adhesion molecule 1                 | ICAM-1         | CAA41977                                      | 0.95 ± 0.02     | 0.035   |
| Lymphotactin precursor                            | Lymphotactin   | AAC50164                                      | 0.95 ± 0.02     | 0.169   |
| Fibroblast growth factor 9                        | FGF-9          | BAA03572                                      | 0.95 ± 0.04     | 0.142   |

| Protein name and function                        | Gene name       | ProteinBank <sup>TM</sup><br>Accession number | Ratio                  | P value |
|--------------------------------------------------|-----------------|-----------------------------------------------|------------------------|---------|
|                                                  |                 |                                               | $\frac{EC/SMC}{EC/EC}$ |         |
| TNF-related apoptosis-inducing ligand receptor 3 | TRAIL R3        | AAM82564                                      | $0.94 \pm 0.06$        | 0.355   |
| p53-associated parkin-like cytoplasmic protein   | PARC            | AAH02879                                      | $0.94 \pm 0.02$        | 0.204   |
| Granulocyte-Colony Stimulating Factor            | GCSF            | AAB27157                                      | $0.94 \pm 0.03$        | 0.060   |
| PIGF                                             | PIGF            | CAG33281                                      | $0.93 \pm 0.01$        | 0.038   |
| Macrophage inflammatory protein 1 beta           | MIP-1 $\beta$   | P13236                                        | $0.93 \pm 0.04$        | 0.157   |
| Insulin-like growth factor 1 (somatomedin C)     | IGF-1 SR        | NP_000609                                     | $0.93 \pm 0.02$        | 0.070   |
| Small inducible cytokine B13 precursor (CXCL13)  | BLC             | O43927                                        | $0.92 \pm 0.01$        | 0.006   |
| HGF                                              | HGF protein     | AAI05798                                      | $0.92 \pm 0.02$        | 0.014   |
| Growth-related oncogene alpha                    | GRO- $\alpha$   | AAP13103                                      | $0.91 \pm 0.02$        | 0.147   |
| Interleukin 1 receptor, type I                   | IL-1 R1         | NP_032388                                     | $0.91 \pm 0.01$        | 0.143   |
| Granulocyte chemotactic protein 2                | GCP-2           | CAA70023                                      | $0.91 \pm 0.02$        | 0.002   |
| Interleukin 16                                   | IL-16           | AAH40272                                      | $0.91 \pm 0.03$        | 0.030   |
| Tumor necrosis factor receptor 2 precursor       | sTNF RII        | NP_001057                                     | $0.90 \pm 0.06$        | 0.048   |
| Interleukin 1 receptor antagonist isoform 4      | IL-1R4/ST2      | NP_776215                                     | $0.89 \pm 0.02$        | 0.008   |
| Oncostatin M                                     | Oncostatin M    | AAD31435                                      | $0.89 \pm 0.02$        | 0.011   |
| Urokinase-type plasminogen activator receptor    | uPAR            | AAF71751                                      | $0.89 \pm 0.04$        | 0.025   |
| Macrophage inflammatory protein 3 beta           | MIP-3 $\beta$   | Q99731                                        | $0.88 \pm 0.03$        | 0.009   |
| Interleukin 12 p40                               | IL-12 p40       | NP_000873                                     | $0.88 \pm 0.05$        | 0.077   |
| Osteoprotegerin                                  | Osteoprotegerin | AAF20168                                      | $0.87 \pm 0.03$        | 0.001   |
| Neurotrophin 4                                   | NT-4            | AAA60154                                      | $0.87 \pm 0.03$        | 0.017   |

| Protein name and function                        | Gene name    | ProteinBank <sup>TM</sup><br>Accession number | Ratio                  | P value |
|--------------------------------------------------|--------------|-----------------------------------------------|------------------------|---------|
|                                                  |              |                                               | $\frac{EC/SMC}{EC/EC}$ |         |
| Insulin-like growth factor 1                     | IGF-1        | CAA40342                                      | $0.87 \pm 0.03$        | 0.083   |
| Human CC chemokine 4                             | HCC-4        | O15467                                        | $0.86 \pm 0.01$        | 0.002   |
| Glucocorticoid-induced TNF-related ligand        | GITR-Ligand  | Q9UNG2                                        | $0.86 \pm 0.04$        | 0.007   |
| Ciliary neurotrophic factor                      | CNTF         | CAA43009                                      | $0.85 \pm 0.02$        | 0.003   |
| Vascular endothelial growth factor D             | VEGF-D       | CAA03942                                      | $0.85 \pm 0.06$        | 0.068   |
| Macrophage-derived chemokine precursor           | MDC          | AAB58360                                      | $0.85 \pm 0.05$        | 0.013   |
| TNF-related apoptosis-inducing ligand receptor 4 | TRAIL R4     | Q9UBN6                                        | $0.84 \pm 0.03$        | 0.002   |
| Interleukin 17                                   | IL-17        | CAI16678                                      | $0.84 \pm 0.01$        | 0.0004  |
| Glucocorticoid-induced TNFR-related protein      | GITR         | Q9Y5U5                                        | $0.83 \pm 0.01$        | 0.001   |
| Glial cell derived neurotrophic factor           | GDNF         | CAG46721                                      | $0.83 \pm 0.02$        | 0.01    |
| Angiogenin 2                                     | Angiogenin-2 | AAL67711                                      | $0.82 \pm 0.01$        | 0.002   |
| Vascular endothelial growth factor               | VEGF         | AAA35789                                      | $0.82 \pm 0.02$        | 0.058   |
| IL13 protein                                     | IL-13        | AAH96141                                      | $0.82 \pm 0.02$        | 0.001   |
| Epidermal growth factor                          | EGF          | AAS83395                                      | $0.81 \pm 0.01$        | 0.001   |
| Interleukin 11                                   | IL-11        | AAO13493                                      | $0.81 \pm 0.01$        | 0.001   |
| Interleukin 10                                   | IL-10        | CAA55201                                      | $0.81 \pm 0.02$        | 0.009   |
| Interleukin 7                                    | IL-7         | AAC63047                                      | $0.80 \pm 0.03$        | 0.001   |
| Interleukin 12 p70                               | IL-12 p70    | NP_002178                                     | $0.79 \pm 0.04$        | 0.005   |
| Interleukin 1 receptor antagonist                | IL-1ra       | AAB41943                                      | $0.79 \pm 0.03$        | 0.001   |
| Insulin-like growth factor binding protein-2     | IGFBP-2      | AAB22308                                      | $0.78 \pm 0.03$        | 0.0001  |

| Protein name and function                    | Gene name      | ProteinBank <sup>TM</sup><br>Accession number | Ratio                  | P value |
|----------------------------------------------|----------------|-----------------------------------------------|------------------------|---------|
|                                              |                |                                               | $\frac{EC/SMC}{EC/EC}$ |         |
| GM-colony stimulating factor                 | GM-CSF         | AAA52578                                      | $0.78 \pm 0.03$        | 0.001   |
| Insulin-like growth factor binding protein 1 | IGFBP-1        | AAV38491                                      | $0.78 \pm 0.03$        | 0.003   |
| Eotaxin 1                                    | Eotaxin-1      | BAA08370                                      | $0.78 \pm 0.02$        | 0.03    |
| Neutrophil activating peptide 2              | NAP-2          | P02775                                        | $0.78 \pm 0.03$        | 0.0004  |
| Monokine induced by interferon-gamma         | MIG            | P18340                                        | $0.77 \pm 0.05$        | 0.003   |
| Insulin-like growth factor binding protein 4 | IGFBP-4        | AAV38694                                      | $0.77 \pm 0.03$        | 0.001   |
| Bone morphogenetic protein 4                 | BMP-4          | BAA06410                                      | $0.75 \pm 0.02$        | 0.002   |
| Neurotrophin 3                               | NT-3           | AAA59953                                      | $0.73 \pm 0.01$        | 0.003   |
| Interferon, gamma                            | IFN- $\gamma$  | NP_000610                                     | $0.73 \pm 0.02$        | 0.01    |
| Macrophage inflammatory protein 3 alpha      | MIP-3 $\alpha$ | AAC50943                                      | $0.73 \pm 0.02$        | 0.06    |
| Macrophage colony-stimulating factor         | M-CSF          | AAA59572                                      | $0.72 \pm 0.02$        | 0.002   |
| Bone morphogenetic protein 6                 | BMP-6          | AAC33283                                      | $0.72 \pm 0.02$        | 0.003   |
| I-309                                        | I-309          | BAC98367                                      | $0.70 \pm 0.02$        | 0.012   |
| Macrophage inflammatory protein 1 delta      | MIP-1 $\delta$ | AAC03539                                      | $0.69 \pm 0.04$        | 0.036   |
| Macrophage migration inhibitory factor       | MIF            | CAG30406                                      | $0.69 \pm 0.03$        | 0.0002  |
| Interleukin 5                                | IL-5           | AAH66282                                      | $0.67 \pm 0.02$        | 0.0006  |
| Interleukin 2                                | IL-2           | CAA25742                                      | $0.62 \pm 0.01$        | 0.0053  |
| Interleukin 3                                | IL-3           | AAK38378                                      | $0.58 \pm 0.05$        | 0.012   |
| Interleukin 4                                | IL-4           | CAA57444                                      | $0.58 \pm 0.01$        | 0.007   |
| Small inducible cytokine A19 precursor       | CK $\beta$ B-1 | Q99731                                        | $0.56 \pm 0.01$        | 0.0004  |
